# Supplementary material for: Excellent surface-enhanced Raman scattering (SERS) based on AgFeO2 semiconductor nanoparticles
Source: Royal Society of Chemistry journal article supplement (doi:10.1039/c3nr03460g), 2013-01-01
Supplement: c3nr03460g.pdf [file c3nr03460g.pdf]

## Supplementary Information

### Excellent surface-enhanced Raman scattering (SERS) based on AgFeO<sub>2</sub> semiconductor nanoparticles

Zhijie Shi<sup>a,b</sup>, Tao Wang<sup>b</sup>, Haiyang Lin<sup>b</sup>, Xiuhua Wang<sup>\*,a</sup>, Juanjuan Ding<sup>a</sup>, Mingwang Shao<sup>\*,b</sup>

<sup>a</sup>Anhui Key Laboratory of Functional Molecular Solids, College of Chemistry and Materials Science, Anhui Normal University, Wuhu 241000, P. R. China

<sup>b</sup>Institute of Functional Nano & Soft Materials (FUNSOM), Jiangsu Key Laboratory for Carbon-based Functional Materials and Devices, Soochow University, Suzhou 215123, P. R. China

#### 1. UV-vis absorption spectrum of the AgFeO<sub>2</sub> nanoparticles

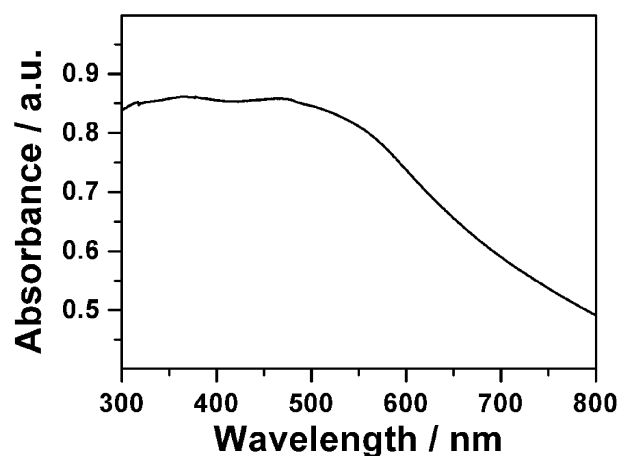

Fig. S1 UV-vis absorption spectrum of the AgFeO<sub>2</sub> nanoparticles.

## 2. Magnetic hysteresis loop of the AgFeO<sub>2</sub> nanoparticles

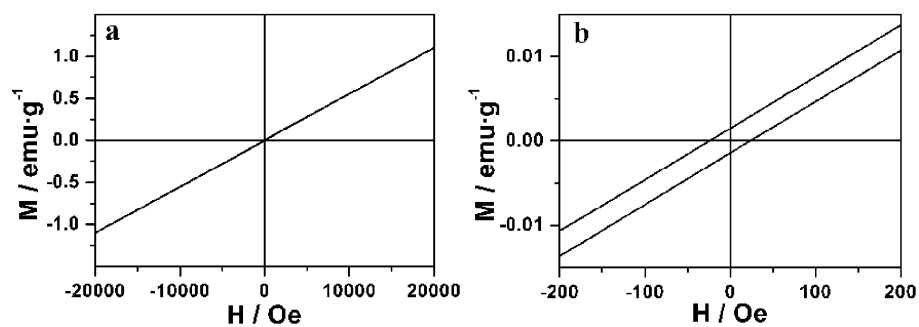

Fig. S2 (a) Magnetic hysteresis loop of the AgFeO<sub>2</sub> nanoparticles at room temperature; and (b) an enlarged magnetic hysteresis loop.

## 3. Raman spectrum of 0.01 M R6G solution

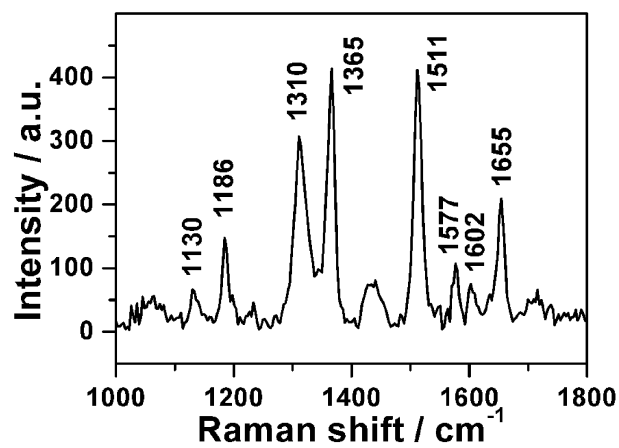

Fig. S3 Raman spectrum of 0.01 M R6G solution.

4. Thermogravimetric analysis (TGA) and differential thermal gravity (DTG) curves  
of the AgFeO<sub>2</sub> nanoparticles

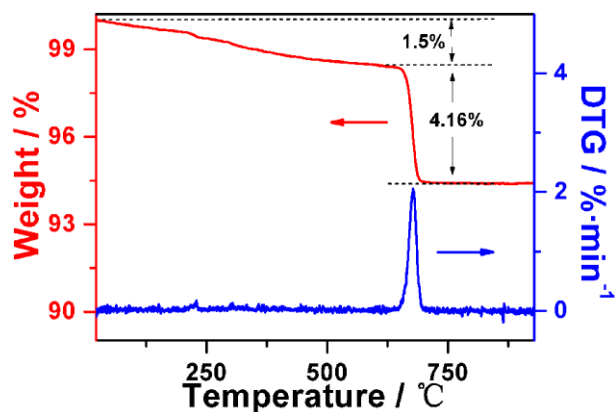

Fig. S4 Thermogravimetric analysis (TGA) and differential thermal gravity (DTG) curves of the AgFeO<sub>2</sub> nanoparticles at a heating rate of temperature of 10 °C under air flow.

5. Raman spectrum of 4-MBA powder

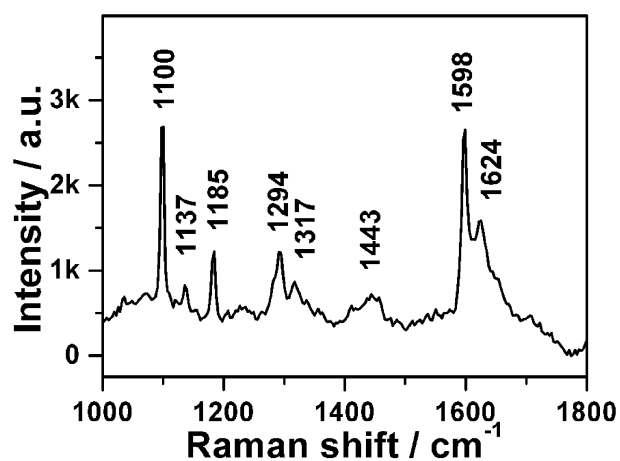

Fig. S5 Raman spectrum of 4-MBA powder.

## 6. Enhancement factor (*EF*) calculation:

The average SERS *EF* was calculated according to the formula:

$$EF = \frac{I_{SERS} N_0}{I_0 N_{SERS}},$$

where  $I_0$  and  $I_{SERS}$  are the peak intensity of the Raman measurement with 0.01 M R6G solution and SERS measurement with  $1 \times 10^{-7}$  M R6G solution, respectively;  $N_0$  and  $N_{SERS}$  are the number of R6G molecules in the scattering volume for the Raman measurement and SERS measurement, respectively.

$$N_0 = n_0 N_A = C_0 V_0 N_A;$$

$$N_{SERS} = n_{SERS} N_A = C_{SERS} V_{SERS} N_A;$$

$$\text{So, } EF = \frac{I_{SERS} N_0}{I_0 N_{SERS}} = \frac{I_{SERS} C_0 V_0 N_A}{I_0 C_{SERS} V_{SERS} N_A} = \frac{2156 \times 0.01}{422 \times 10^{-7}} = 5.1 \times 10^5,$$

where  $n_0$  and  $n_{SERS}$  are the amount substance of R6G molecules in the scattering volume;  $V_0$  and  $V_{SERS}$  are the scattering volume ( $V_0 = V_{SERS}$ );  $C_0$  and  $C_{SERS}$  are the concentration of R6G solution. The subscripts 0 and SERS represent Raman measurement and SERS measurement, respectively.  $A$  is the area of laser spot;  $h$  is the laser spot depth of focus;  $N_A$  is Avogadro constant.

## 7. The intensity of R6G at various external magnetic fields

The SERS spectra of  $1 \times 10^{-7}$  M R6G solution were collected with AgFeO<sub>2</sub> substrate under external magnetic intensity of 0, 2500, 3000, and 3200 Gs. The peak intensities of 1512 cm<sup>-1</sup> were employed to statistically evaluate the effect of external magnetic field, as shown in Fig. S6. The results show that the SERS intensity increases with the

external magnetic field and saturate at 3000 Gs.

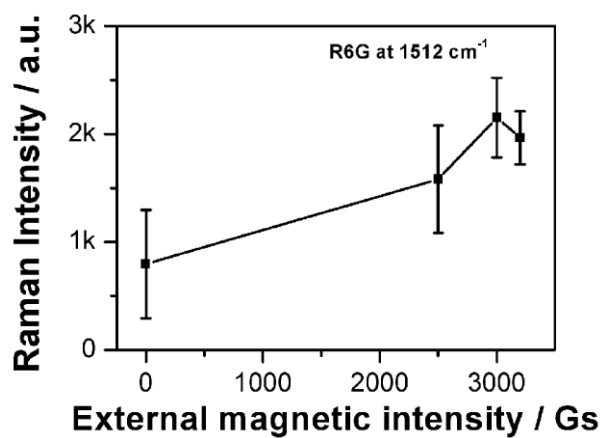

Fig. S6 The effect of external magnetic field on the SERS of  $1 \times 10^{-7}$  M R6G solution, using  $\text{AgFeO}_2$  as substrate.
